# Supplementary material
Source: Springer Nature journal article supplement (https://www.springermedizin.de/resource/supplementary/12874_2012_893_MOESM8_ESM.pdf/9433024)

Figure 3C: Cost-effectiveness acceptability curve for 75-year-old patients

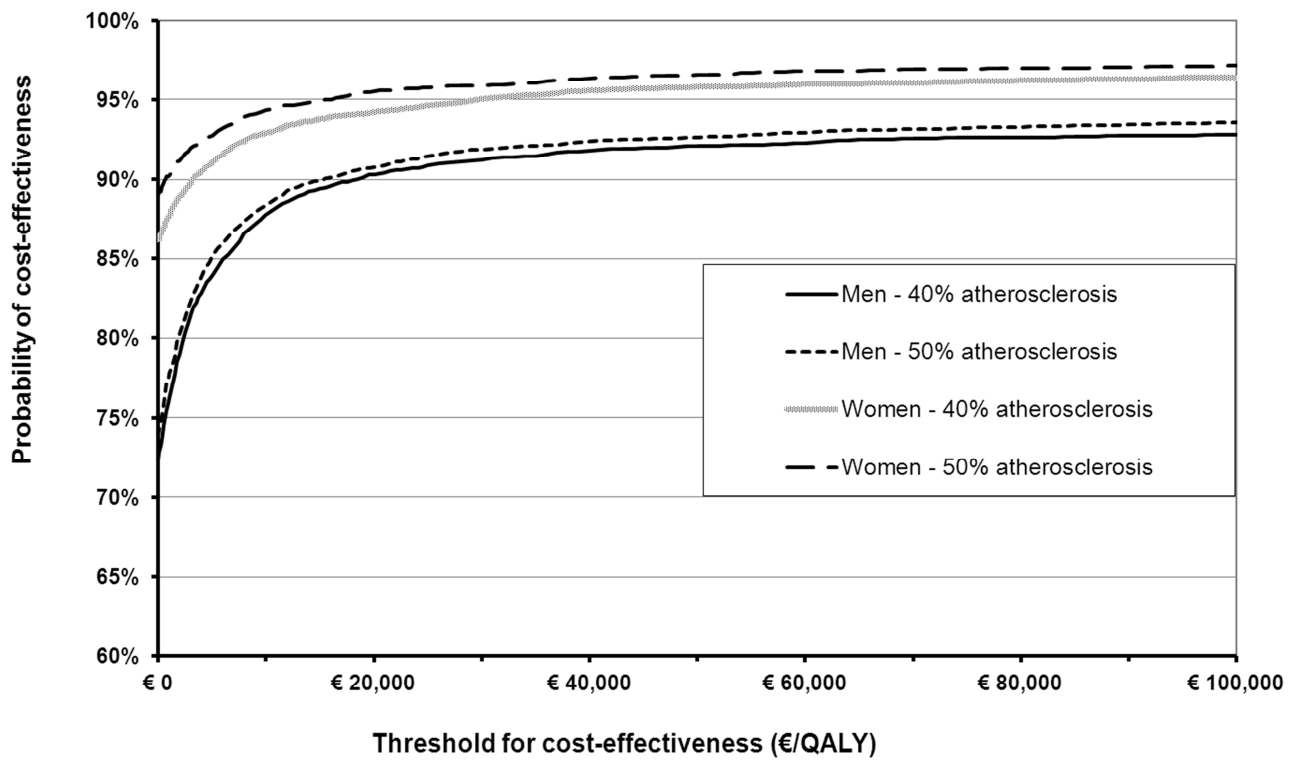

Supplement: MOESM8 [file 9433024]
